# Supplementary material for: Detection of ice core particles via deep neural networks
Source: Copernicus journal article supplement (doi:10.5194/tc-2022-148), 2022-08-26
Supplement: Supplementary file 3 [file tc-2022-148-supplement.zip]

Archive with 7 entries (6 files):
- Supplementary/
- Supplementary/Supplementary.pdf
- Supplementary/figS1.pdf
- Supplementary/figS4.pdf
- Supplementary/figS3.pdf
- Supplementary/figS2.pdf
- Supplementary/figS5.png
