# Supplementary figures and images for: Detection of ice core particles via deep neural networks
Source: Copernicus journal article supplement (doi:10.5194/tc-2022-148), 2022-08-26

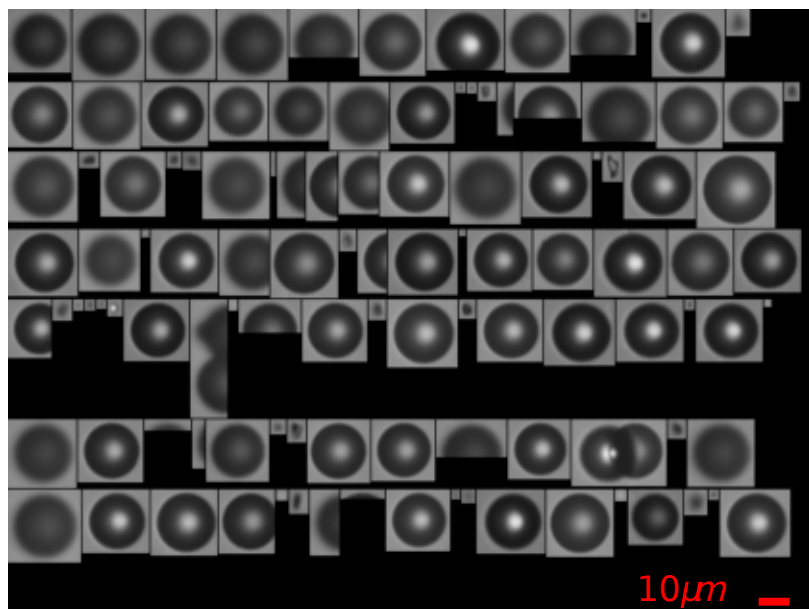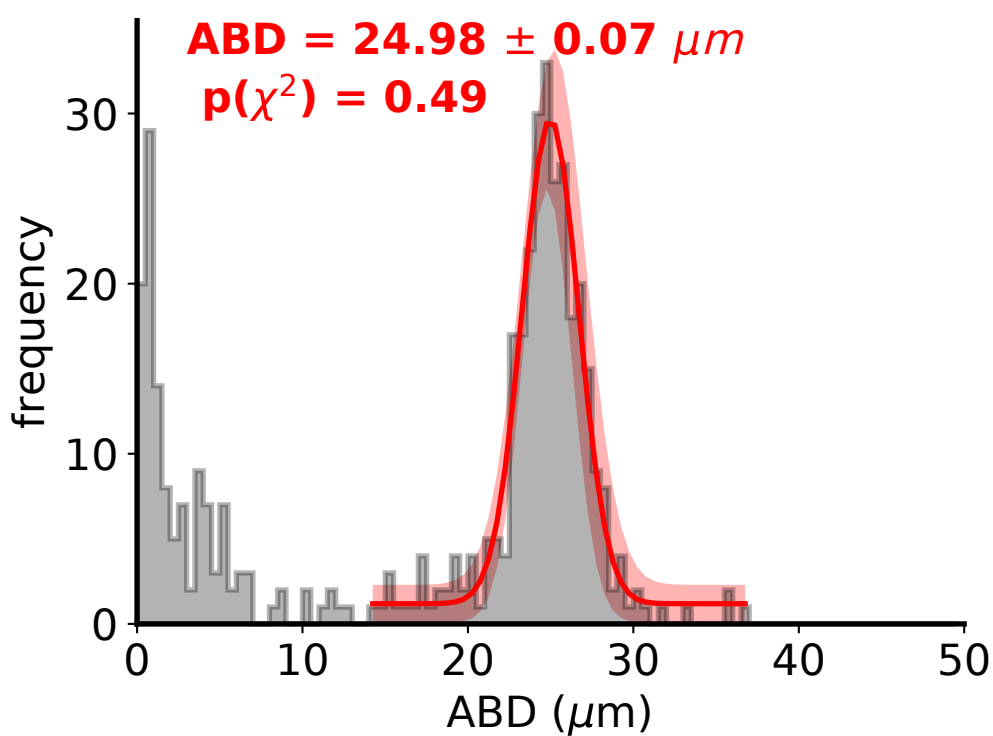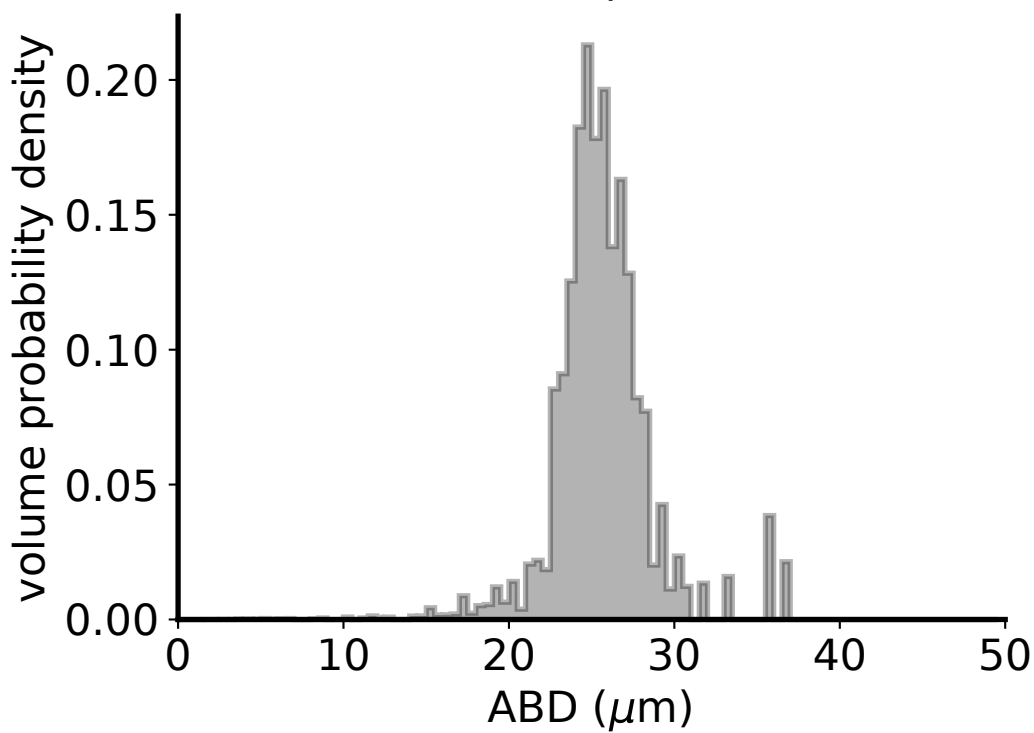

Supplement: Supplementary file 1 [file tc-2022-148-supplement.zip]

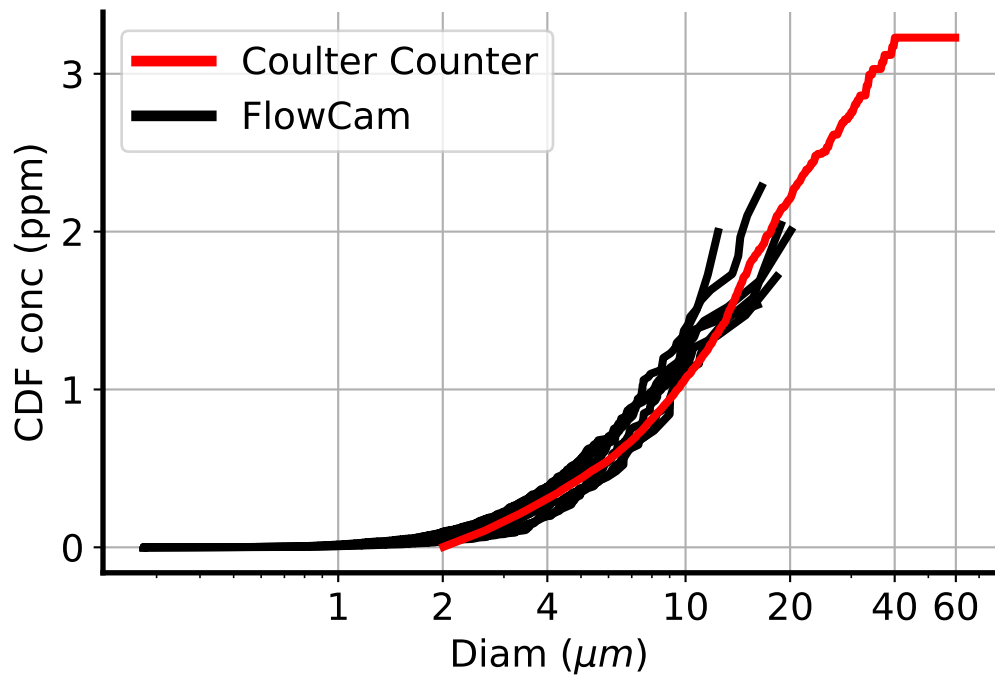

Supplement: Supplementary file 2 [file tc-2022-148-supplement.zip]

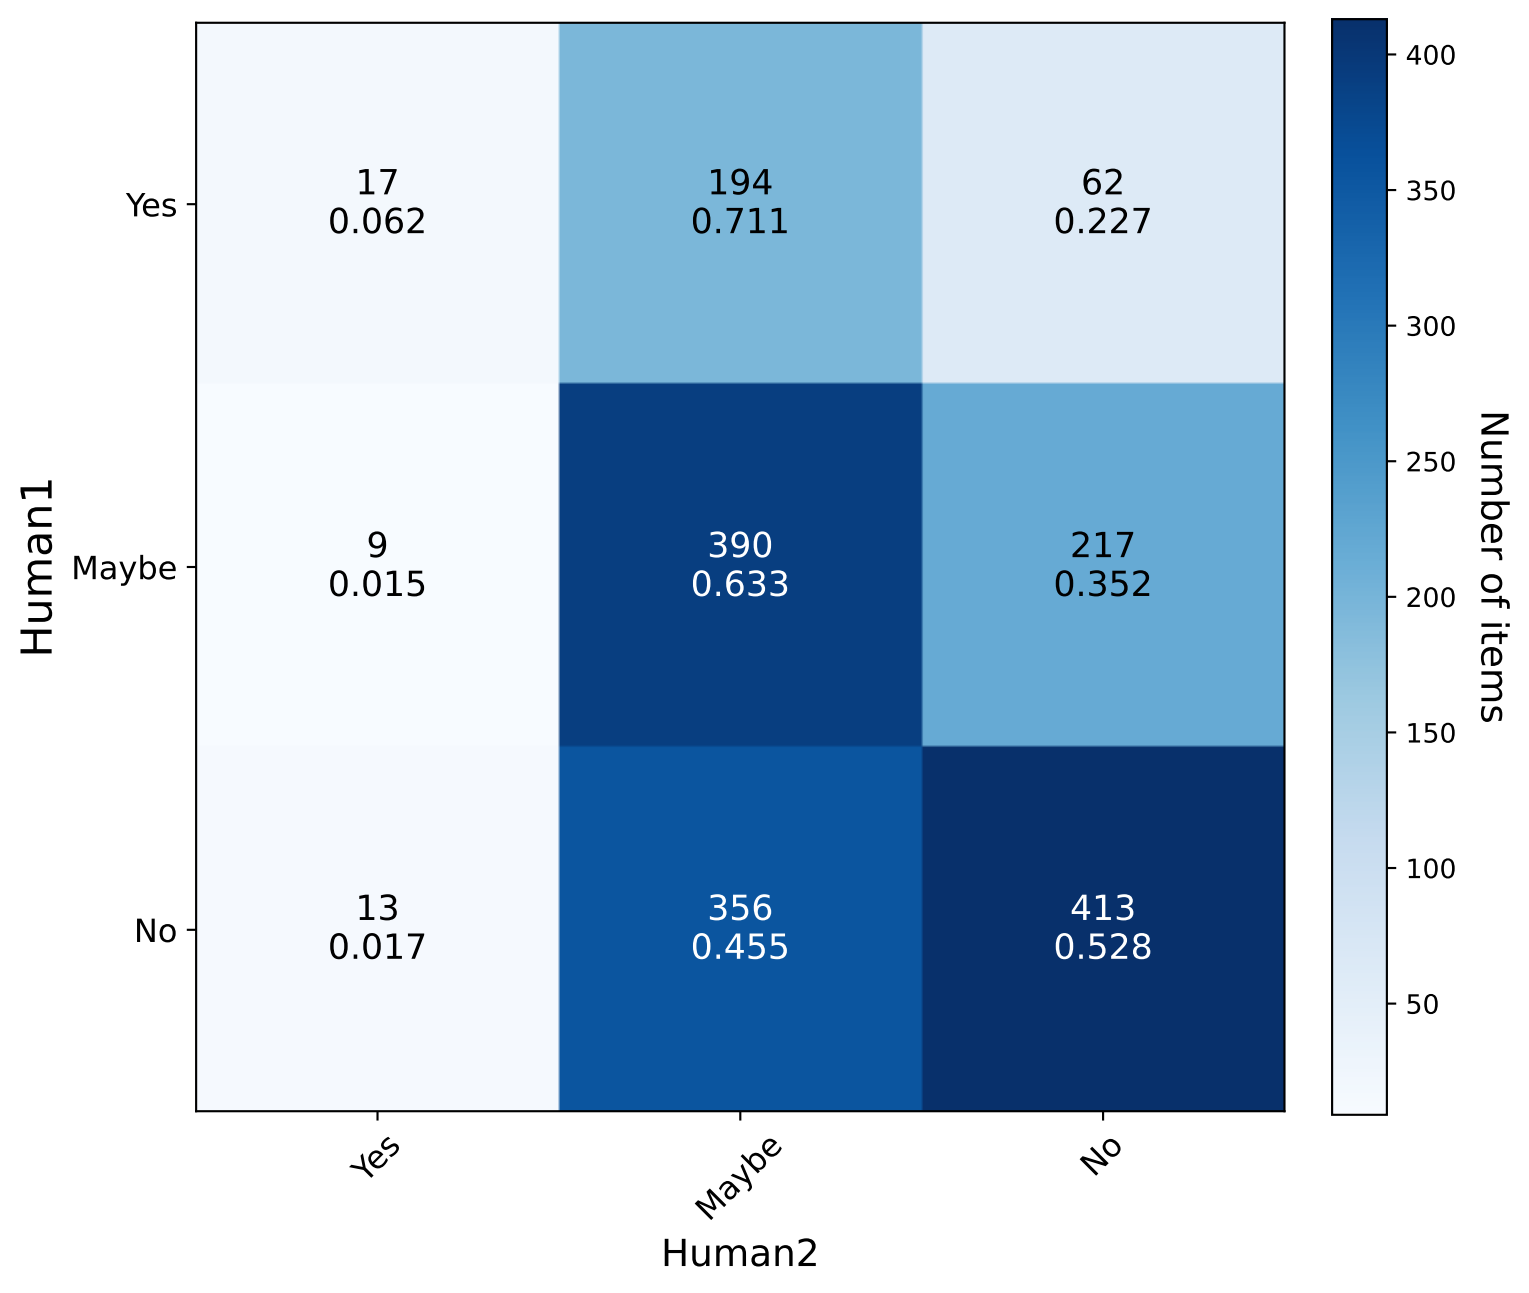

Supplement: Supplementary file 3 [file tc-2022-148-supplement.zip › Supplementary/figS4.pdf]

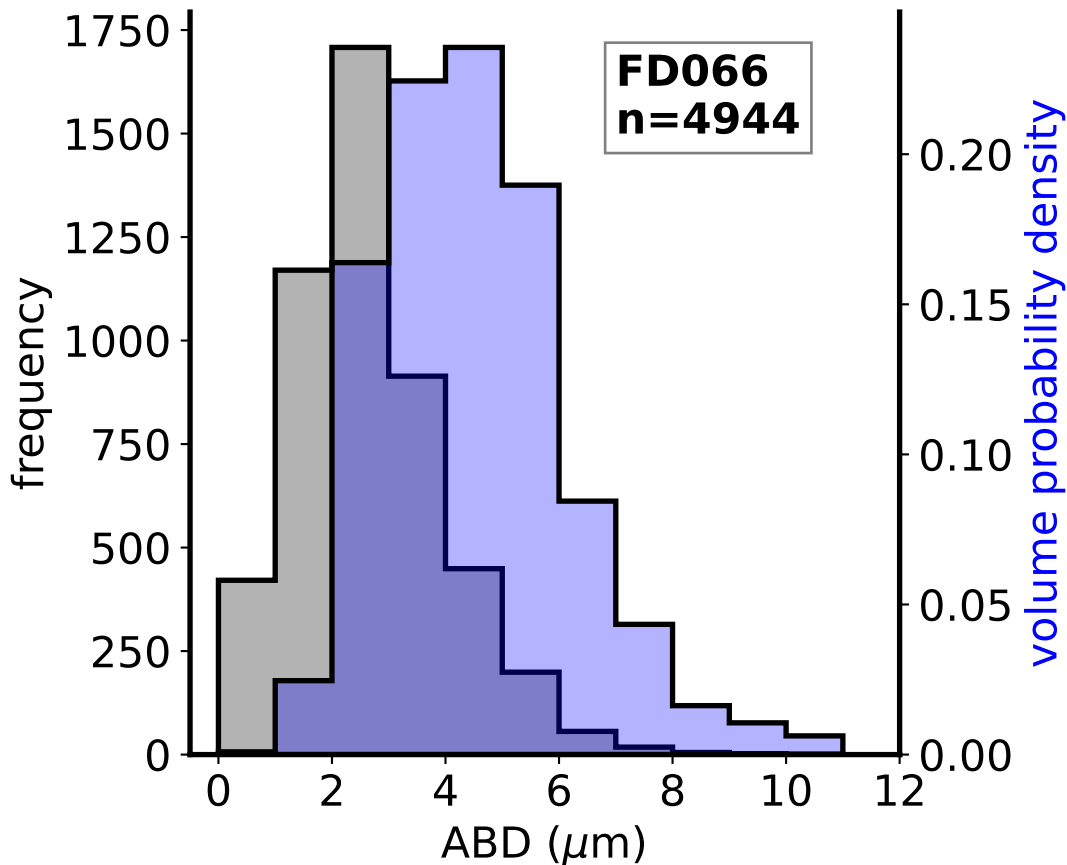

Supplement: Supplementary file 3 [file tc-2022-148-supplement.zip › Supplementary/figS2.pdf]
